# Supplementary material for: Educational needs in the COVID-19 pandemic: a Delphi study among doctors and nurses in Wuhan, China
Source: HighWire-hosted journal article supplement (doi:10.1136/bmjopen-2020-045940), 2021-04-01
Supplement: bmjopen-2020-045940supp001_data_supplement.pdf [file bmjopen-2020-045940supp001_data_supplement.pdf]

(The survey instrument was translated to Chinese prior to distribution)

## Round 1 Survey

---

Age: \_\_\_\_\_

Gender:  Male  Female

Email address: \_\_\_\_\_

Job title:  Doctor  Nurse  Other (please note): \_\_\_\_\_

Years of experience as doctor/nurse/other: \_\_\_\_\_

How many days have you been working in Wuhan treating COVID-19 patients?: \_\_\_\_\_

What is your job in Wuhan:

Treating mostly serious and critical cases in a highly specialized/tertiary hospital

Treating mostly normal and serious cases in a secondary hospital

Treating mostly mild and normal cases in a mobile cabin hospital

Other. Please explain: \_\_\_\_\_

Please answer each of the following three questions. You are free to suggest any educational content - from technical skills to nontechnical skills.

A. What do you need to know and be able to do to optimally treat patients who are infected with the virus? List up to 10 areas, procedures etc.

- 1.
- 2.
- 3.
- 4.
- 5.
- 6.
- 7.
- 8.
- 9.
- 10.

B. What do you need to know and be able to do to prevent spread of the virus? List up to 10 areas, procedures etc.

- 1.
- 2.
- 3.
- 4.
- 5.
- 6.
- 7.
- 8.
- 9.
- 10.

C. What do you need to know and be able to do to protect yourself as a healthcare worker? List up to 10 areas, procedures etc.

- 1.
- 2.
- 3.
- 4.
- 5.
- 6.
- 7.
- 8.
- 9.
- 10.

Thank you for your participation. If you have any extra thoughts or comments you are very welcome to note them here:

---

---

---

---
